# Supplementary material for: Experimental methods modestly impact interpretation of the effect of environmental exposures on the larval zebrafish gut microbiome
Source: PubMed Central journal article supplement (PMC9411601; doi:10.1038/s41598-022-18532-x), 2022-08-25
Supplement: 41598_2022_18532_MOESM1_ESM.pdf [file 41598_2022_18532_MOESM1_ESM.pdf]

BaP Treatment control BaP

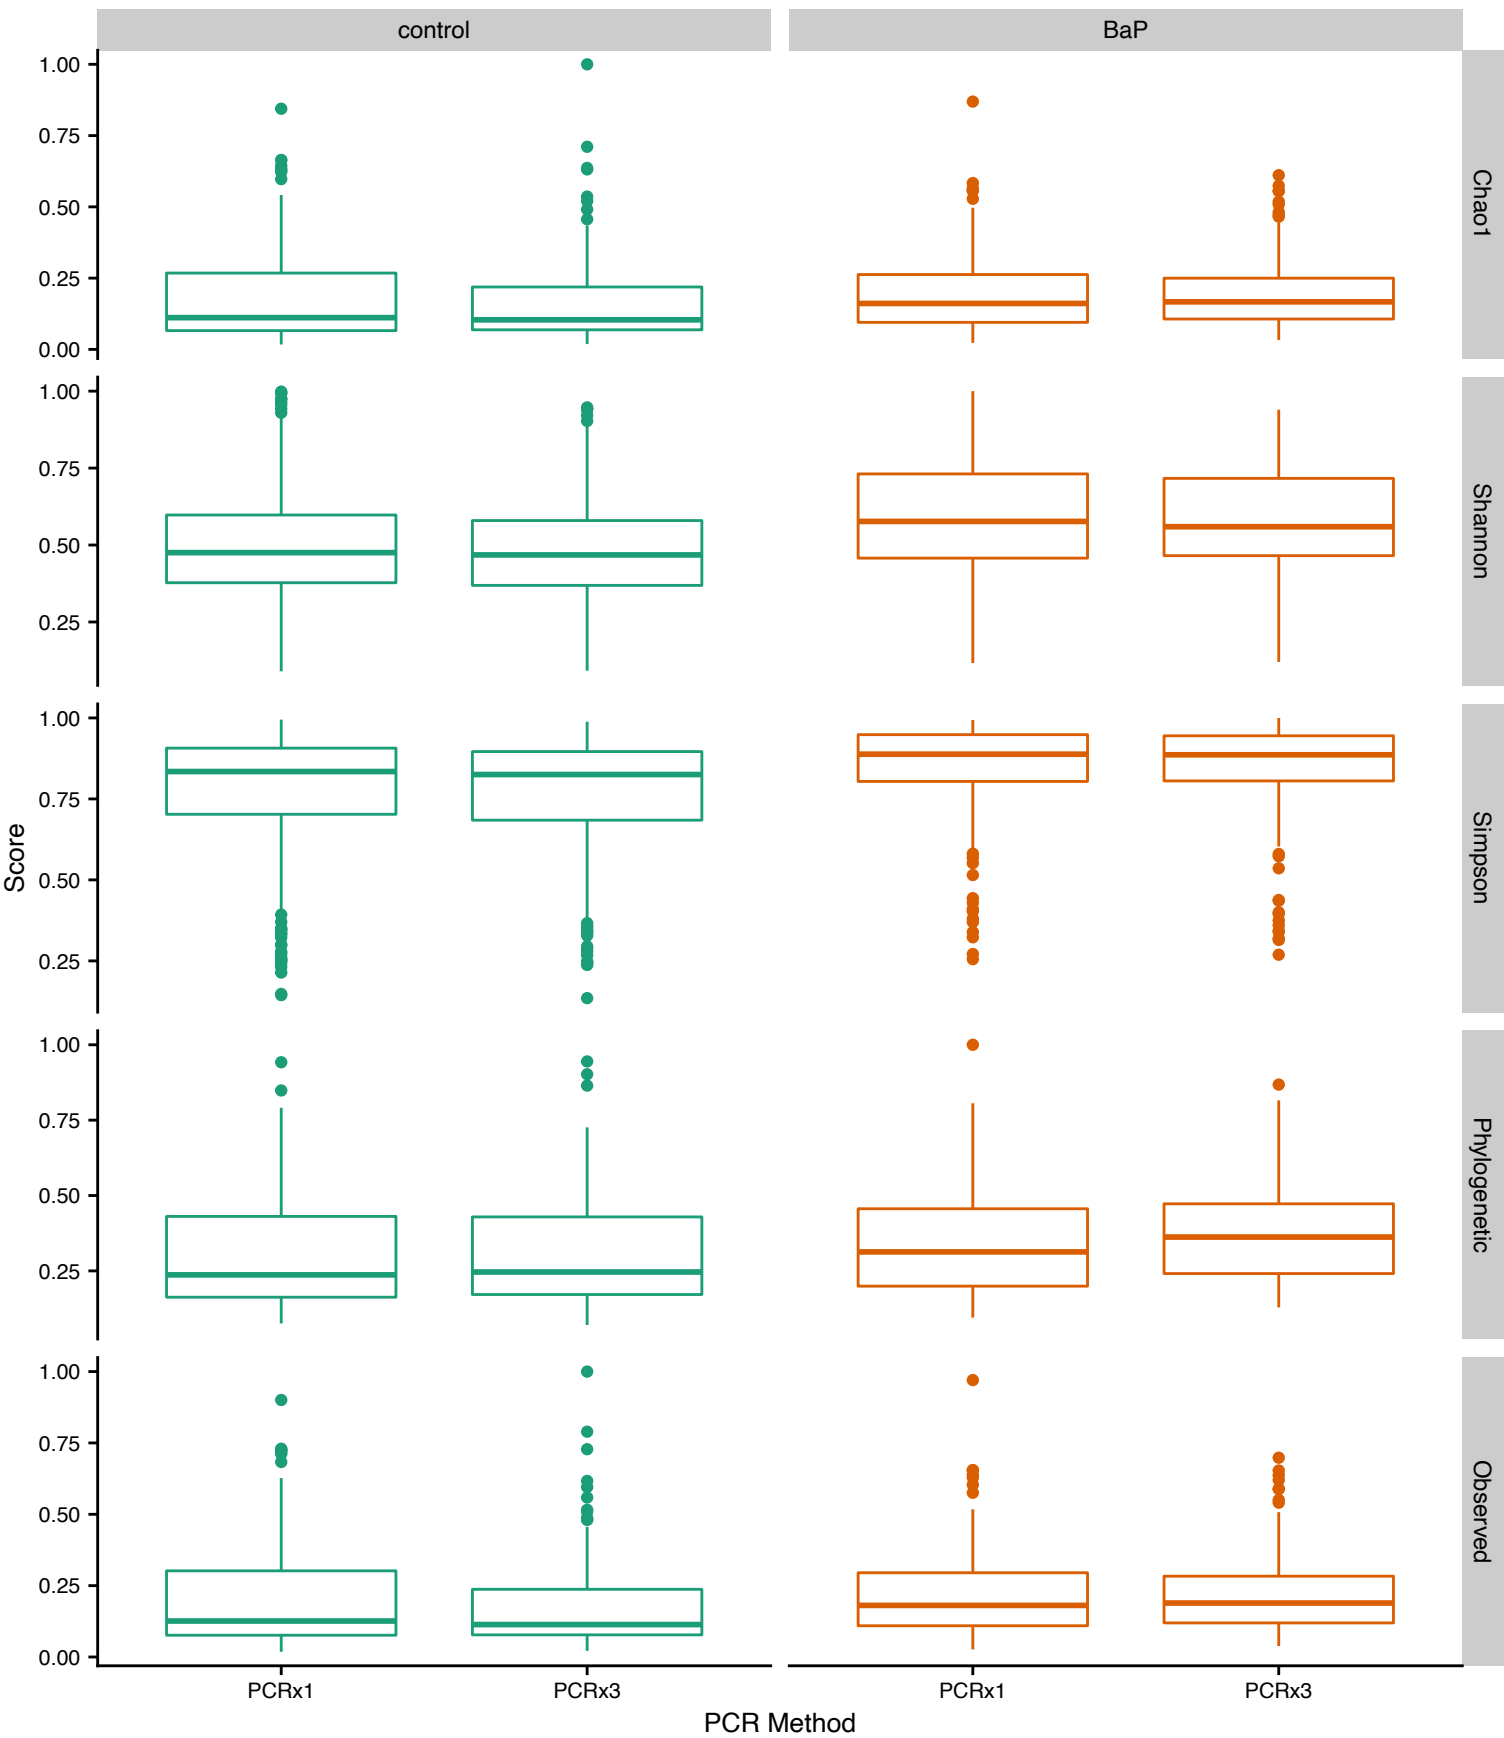





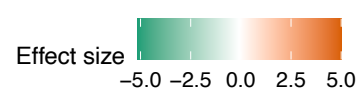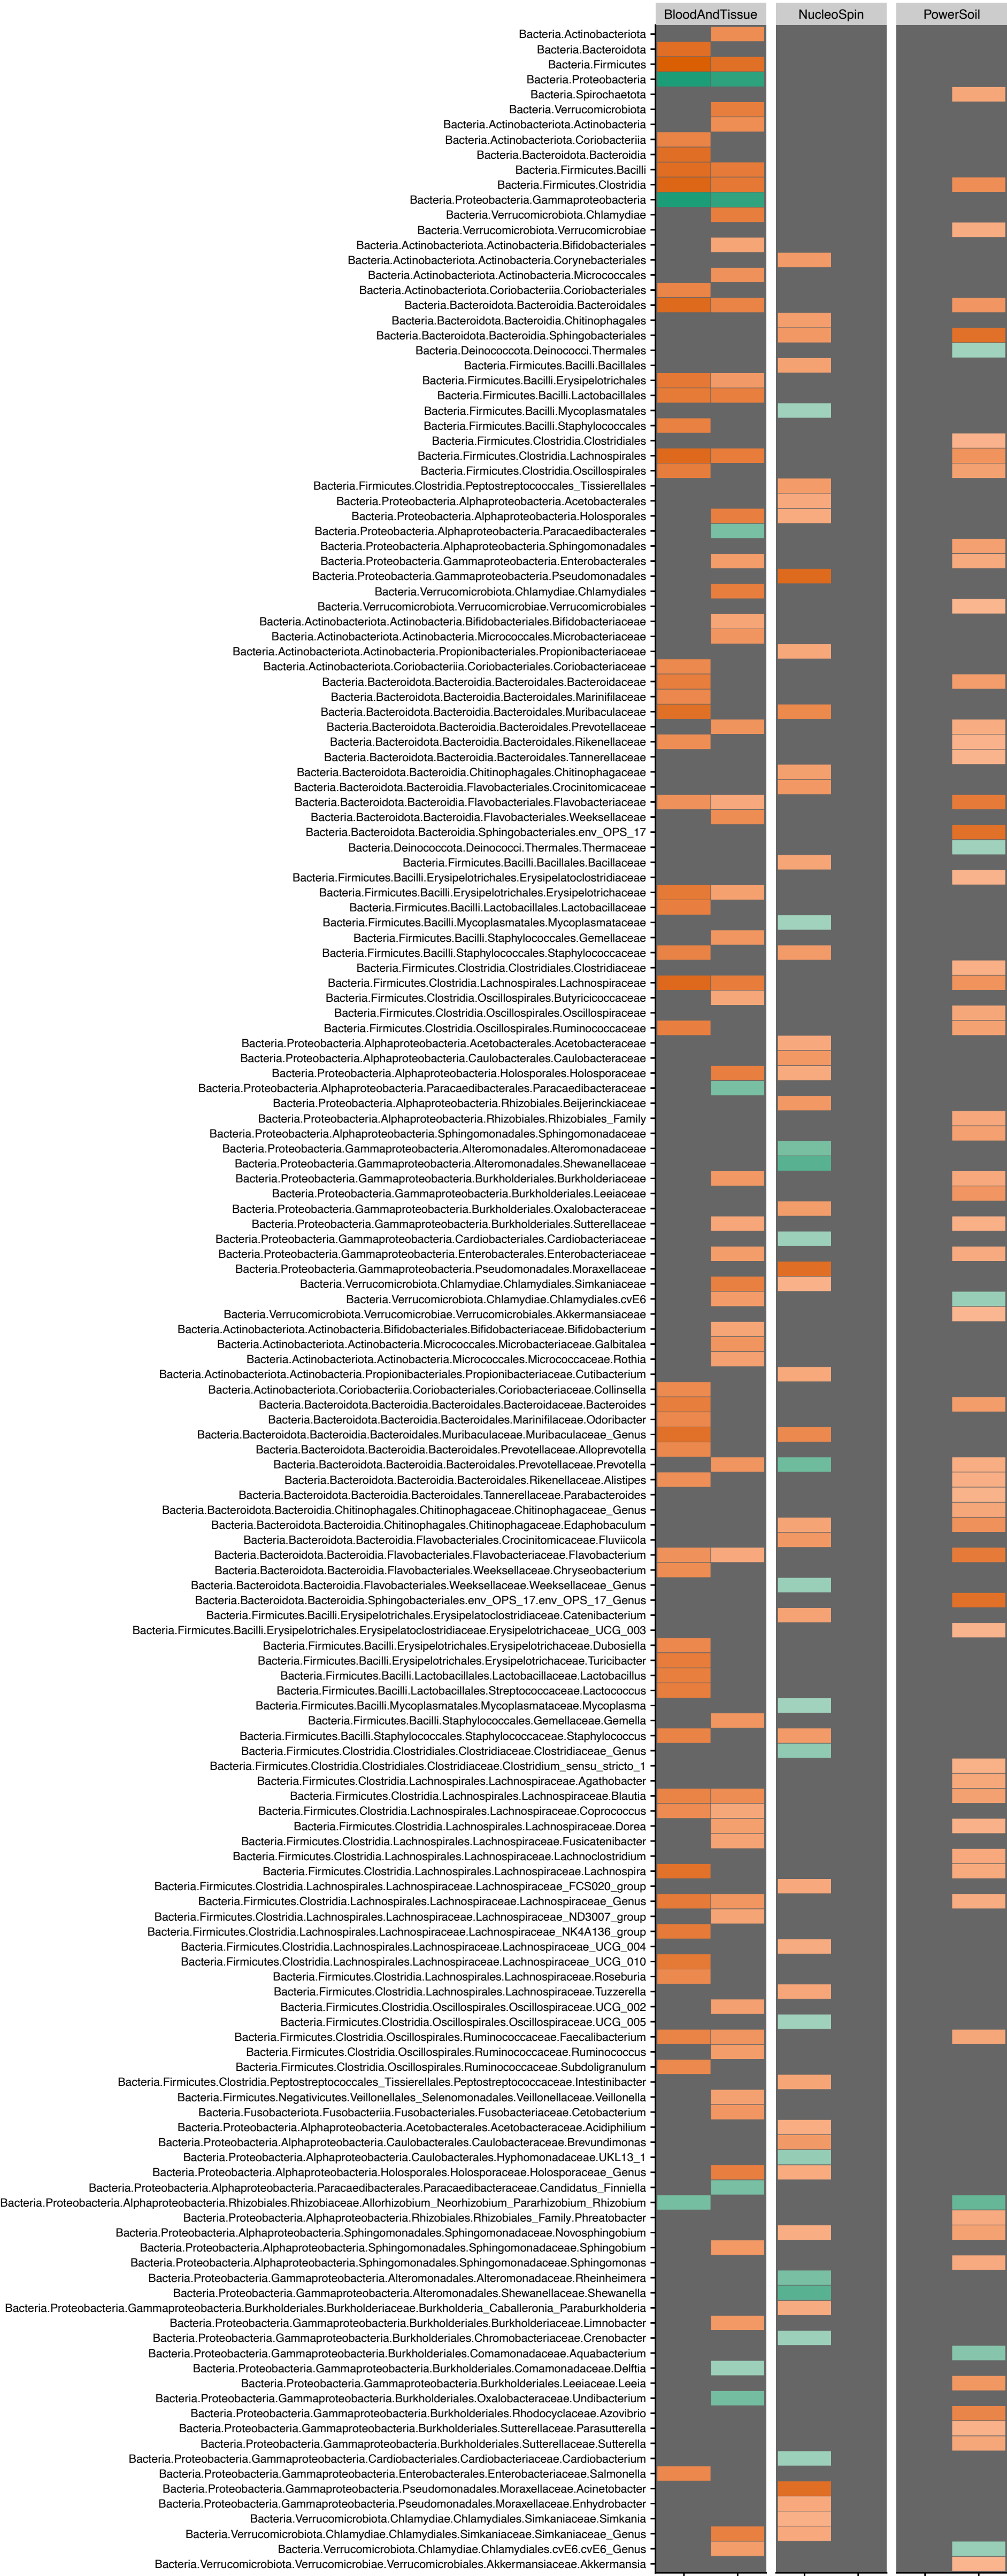

dissected whole fish    dissected whole fish    dissected whole fish

**a**

Dissection Status — Dissected — Whole Fish

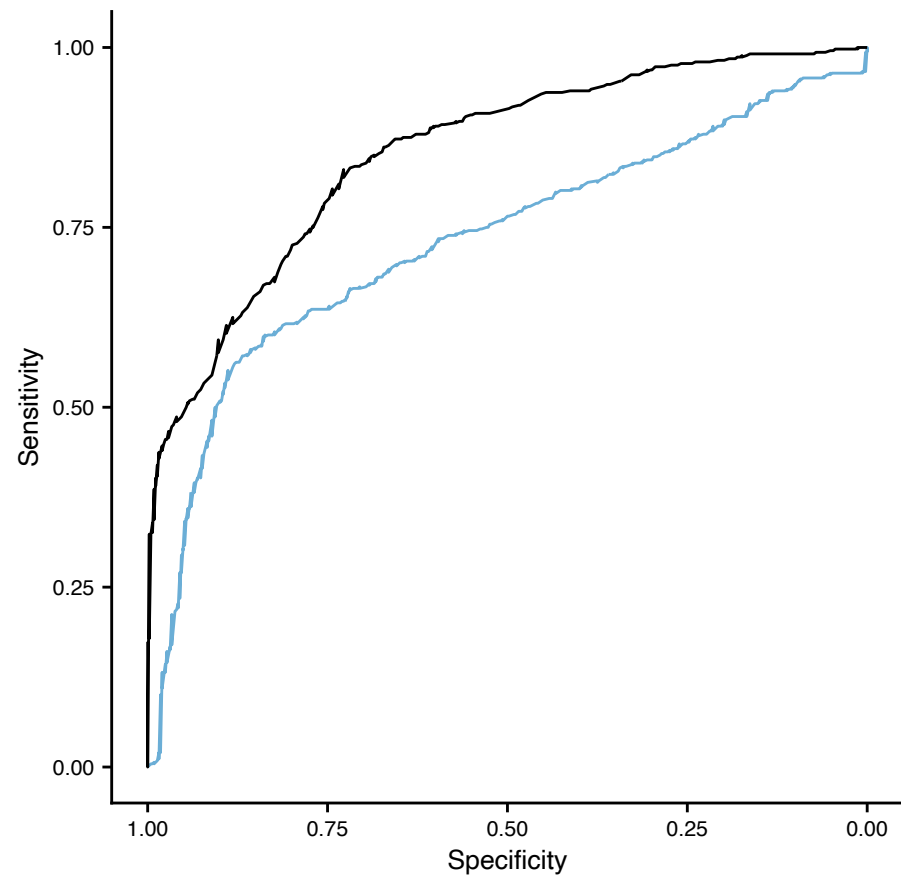

| Dissection Method | AUC   |
|-------------------|-------|
| Dissected         | 0.730 |
| Whole Fish        | 0.854 |

**b**

Extraction.Kit — Blood &amp; Tissue — NucleoSpin — PowerSoil

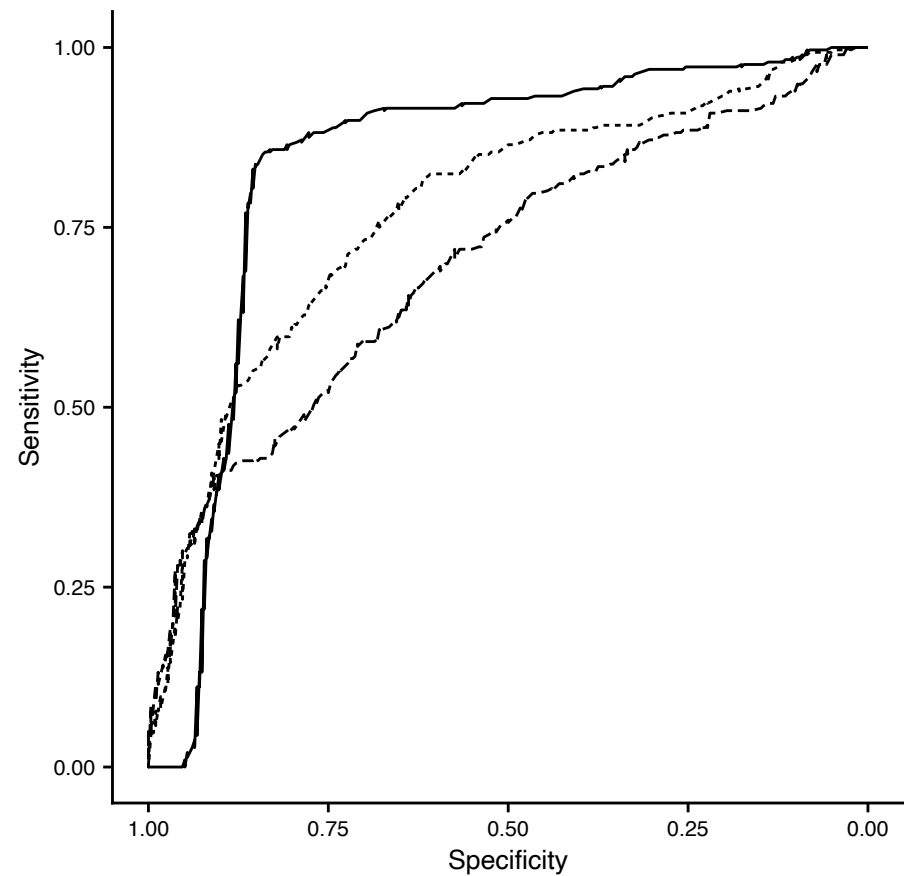

| Extraction Kit | AUC   |
|----------------|-------|
| Blood & Tissue | 0.838 |
| NucleoSpin     | 0.773 |
| PowerSoil      | 0.701 |

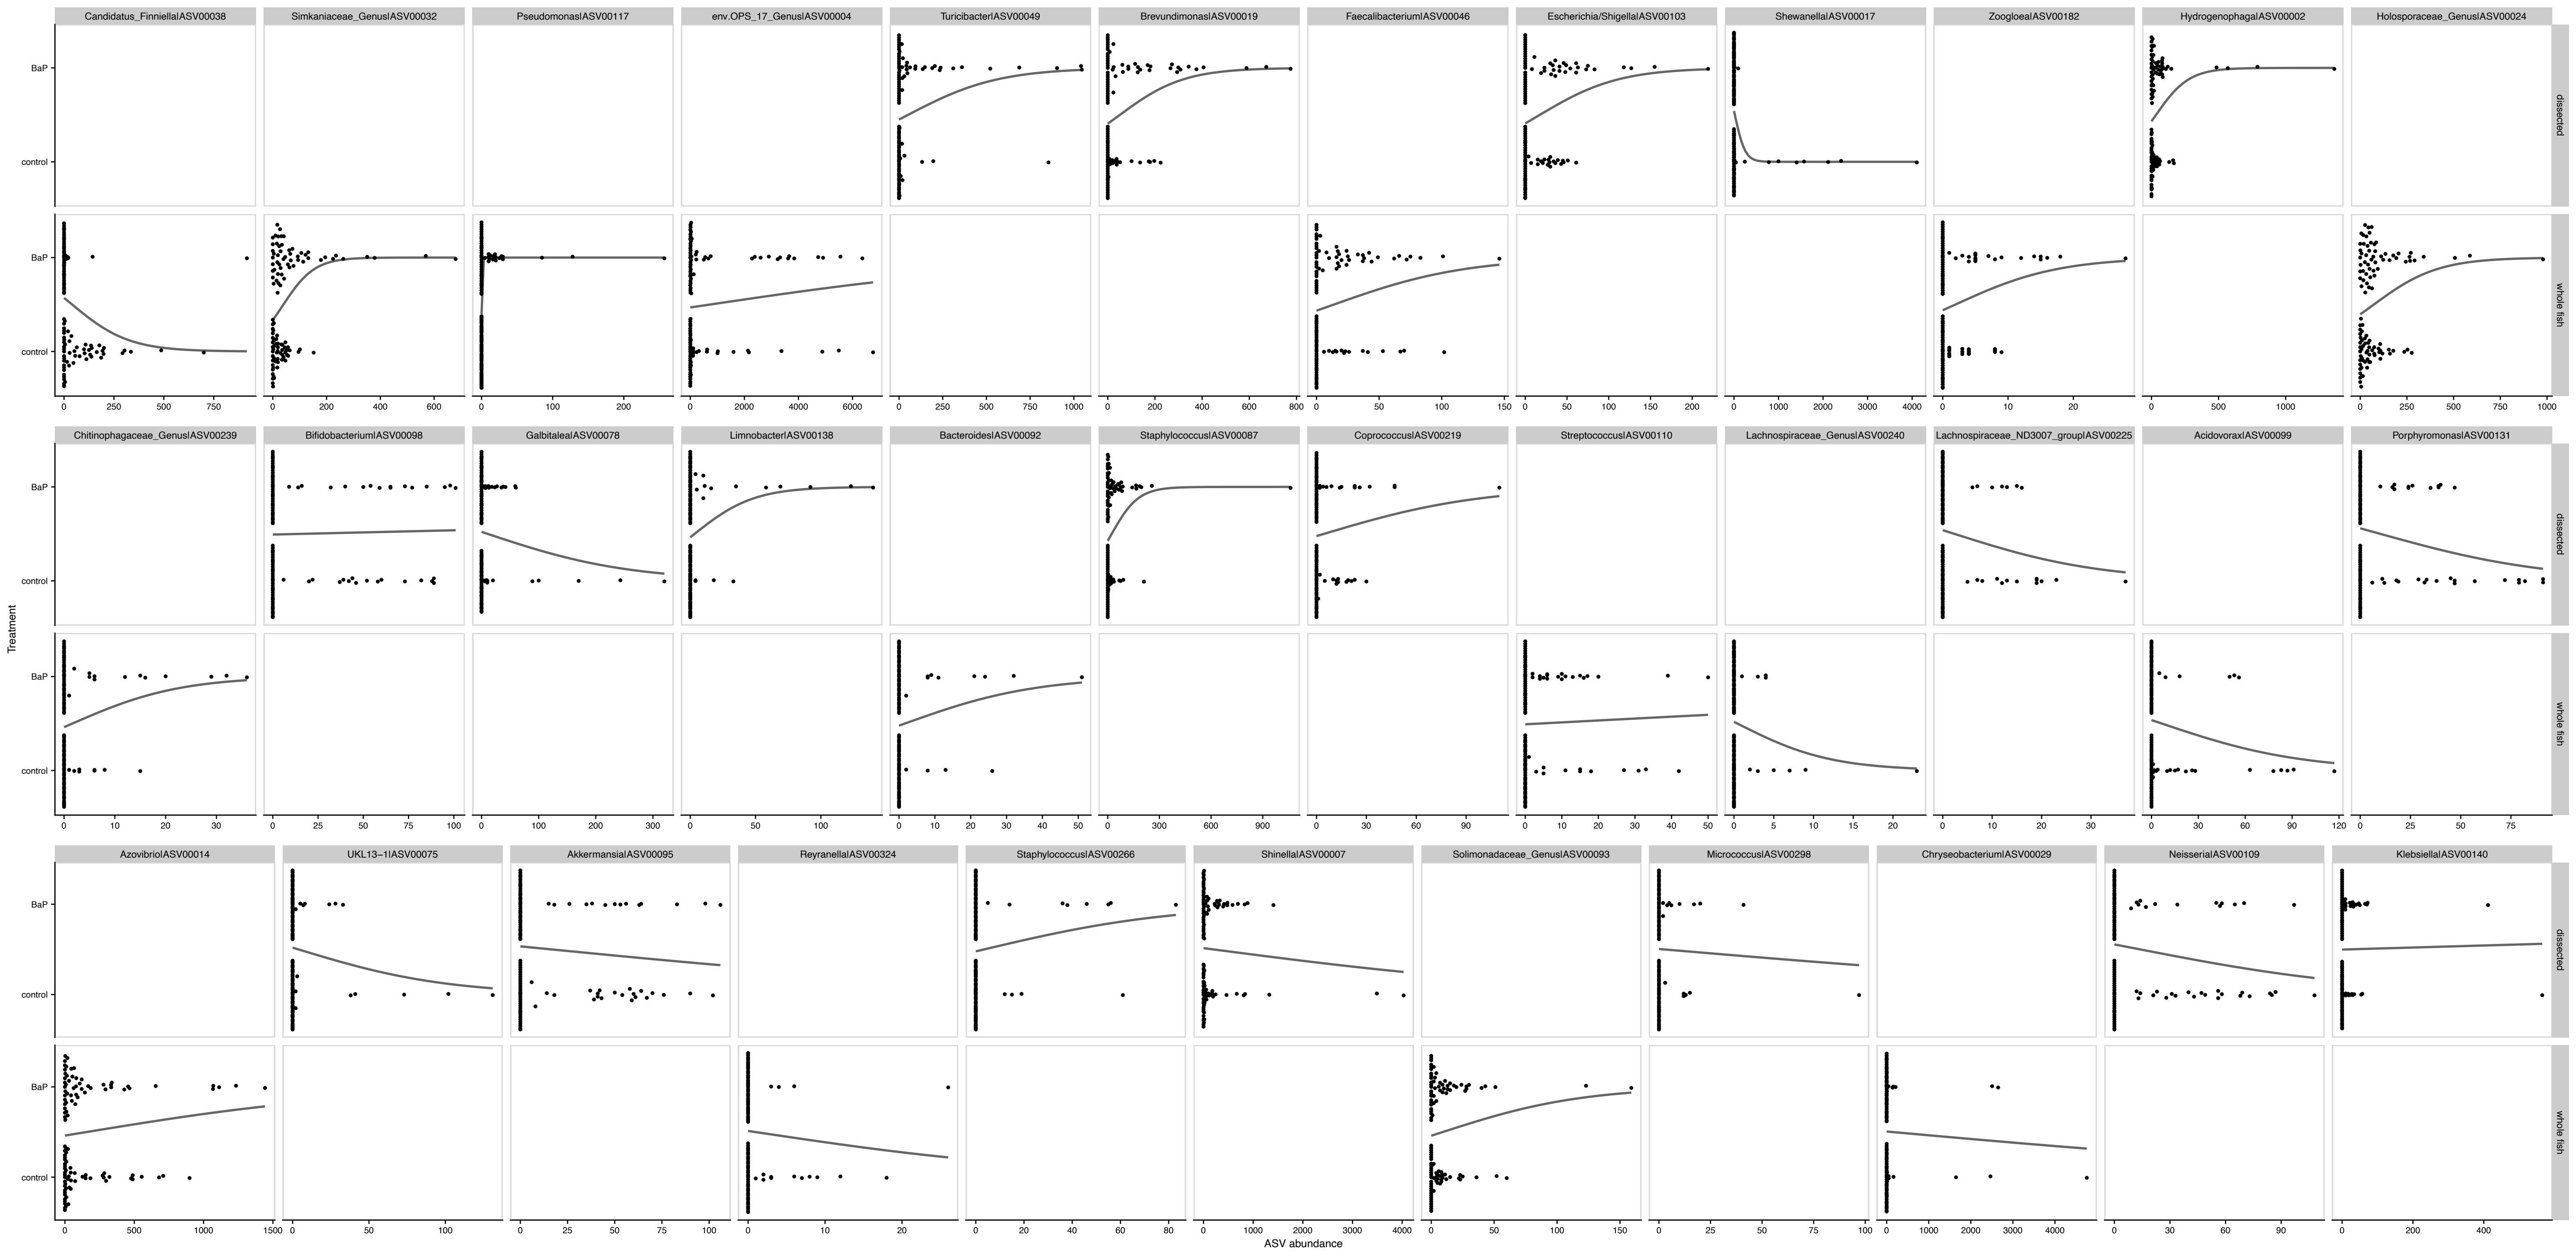

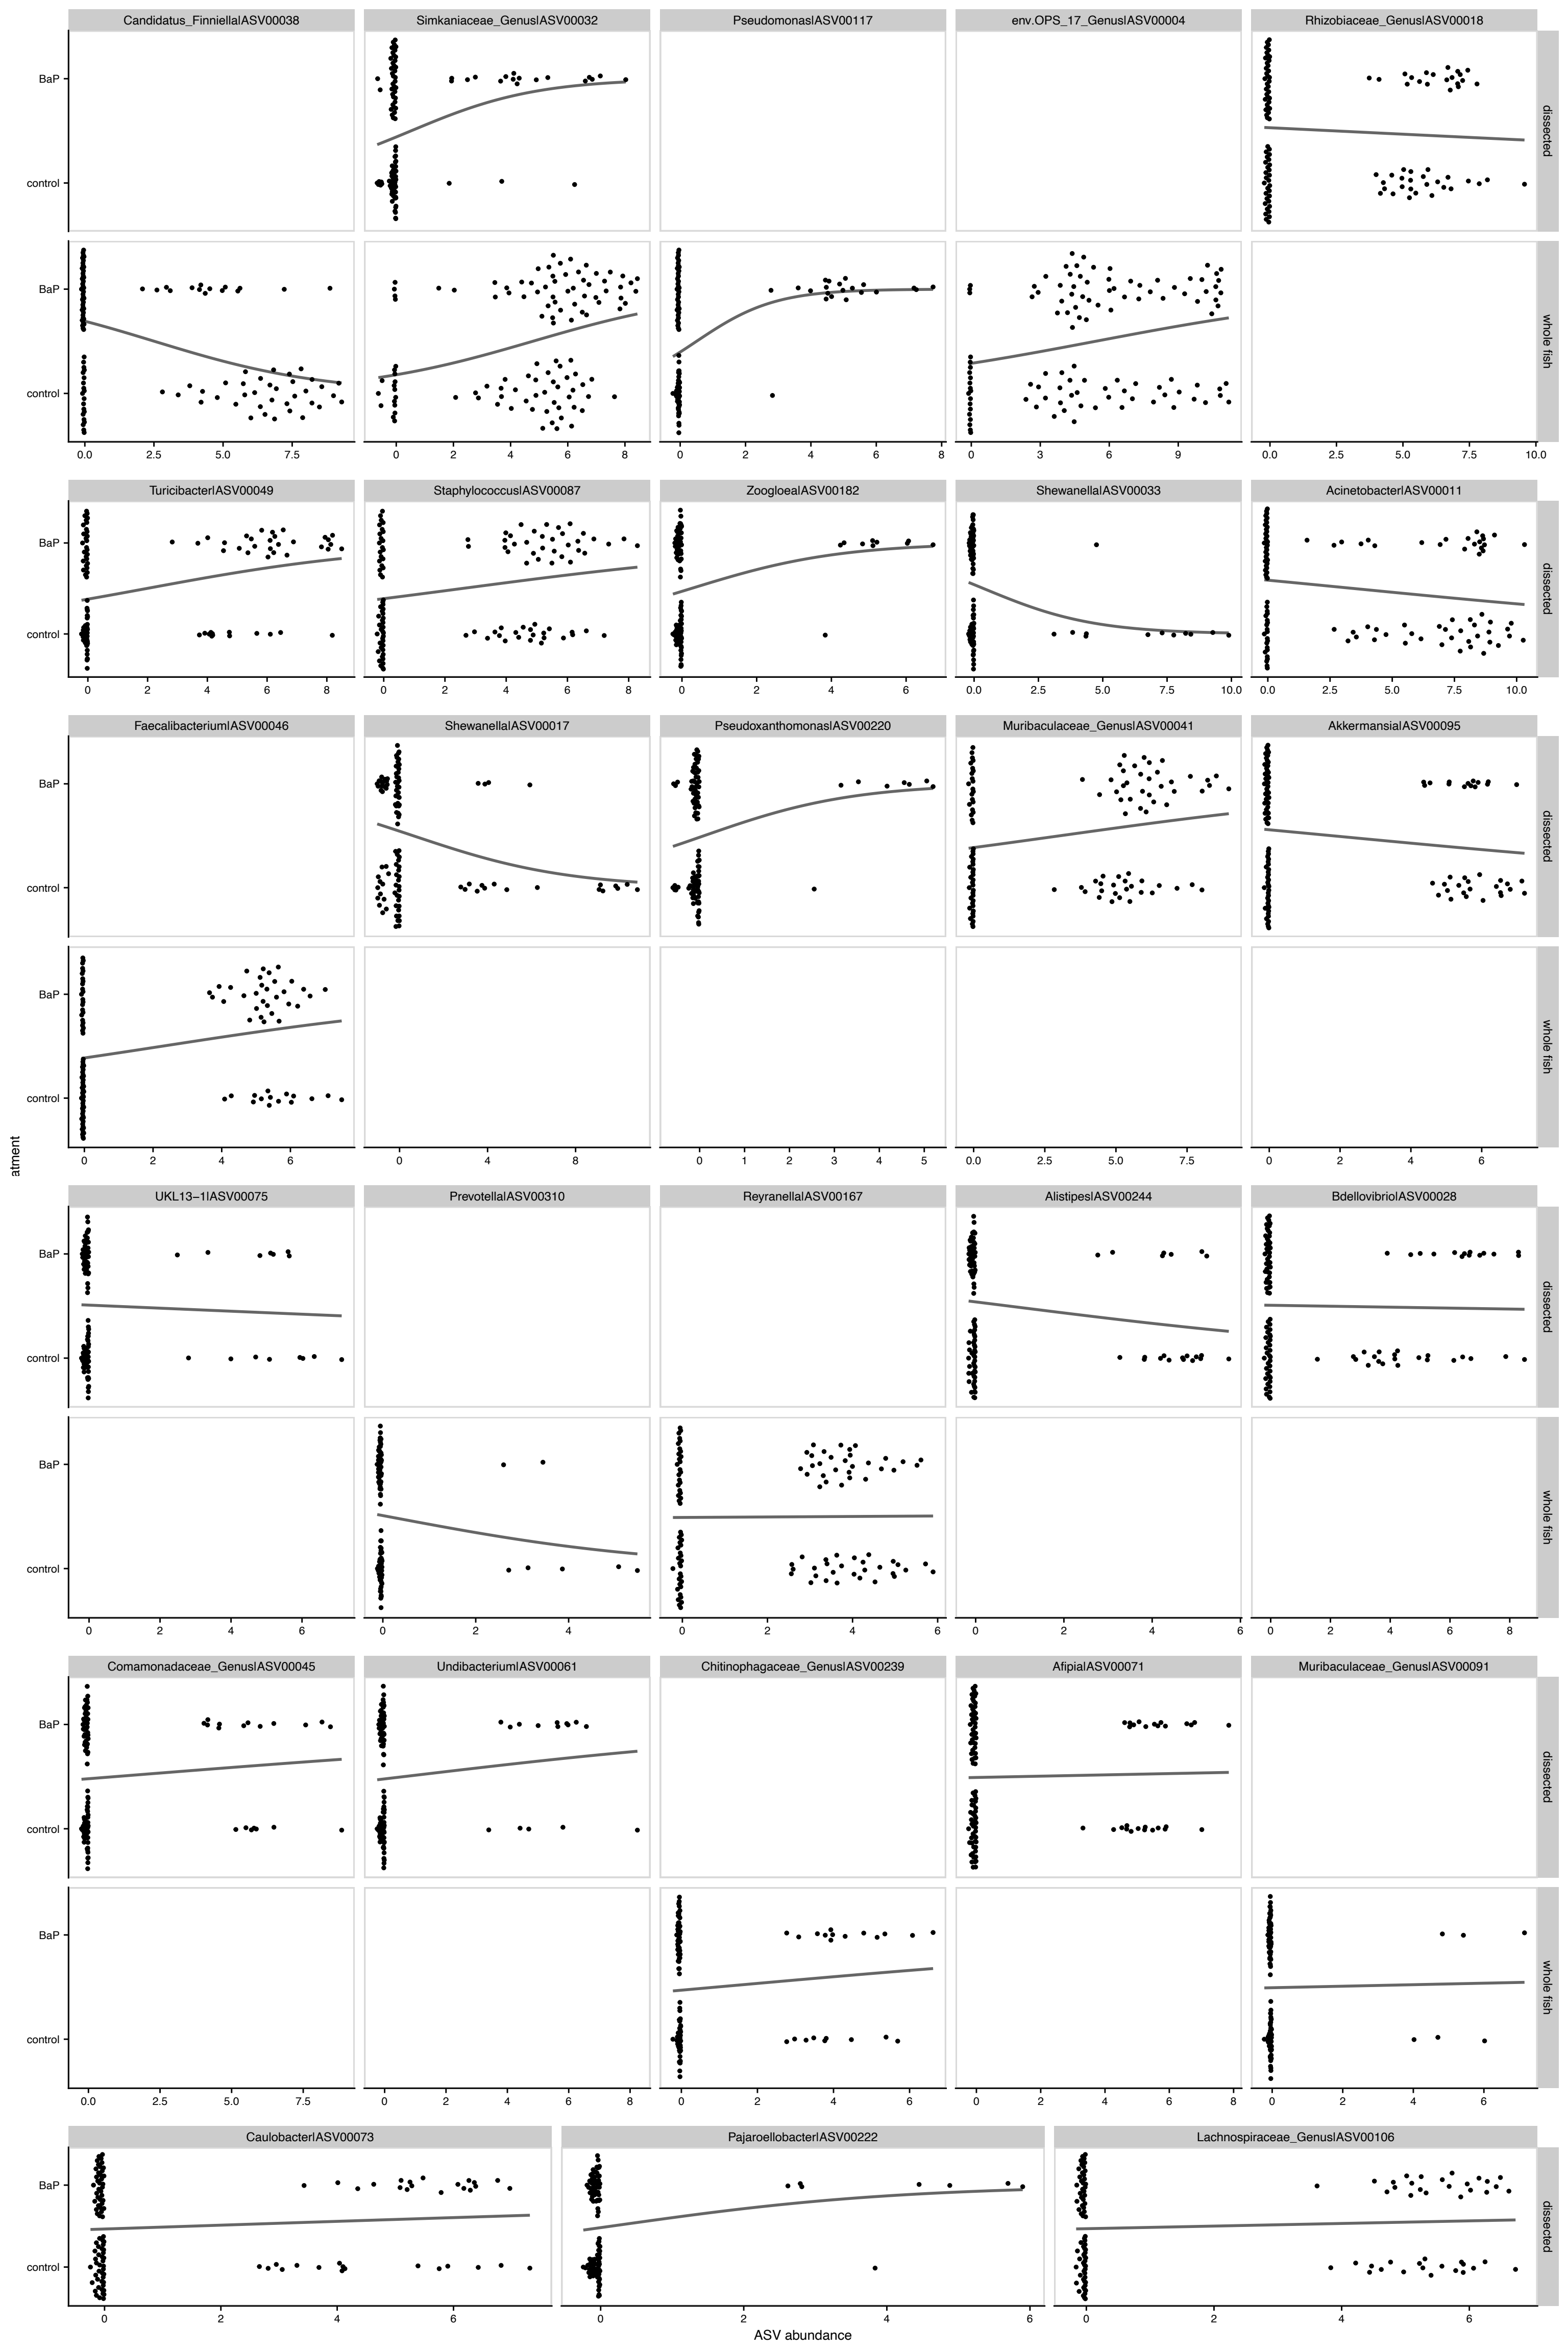

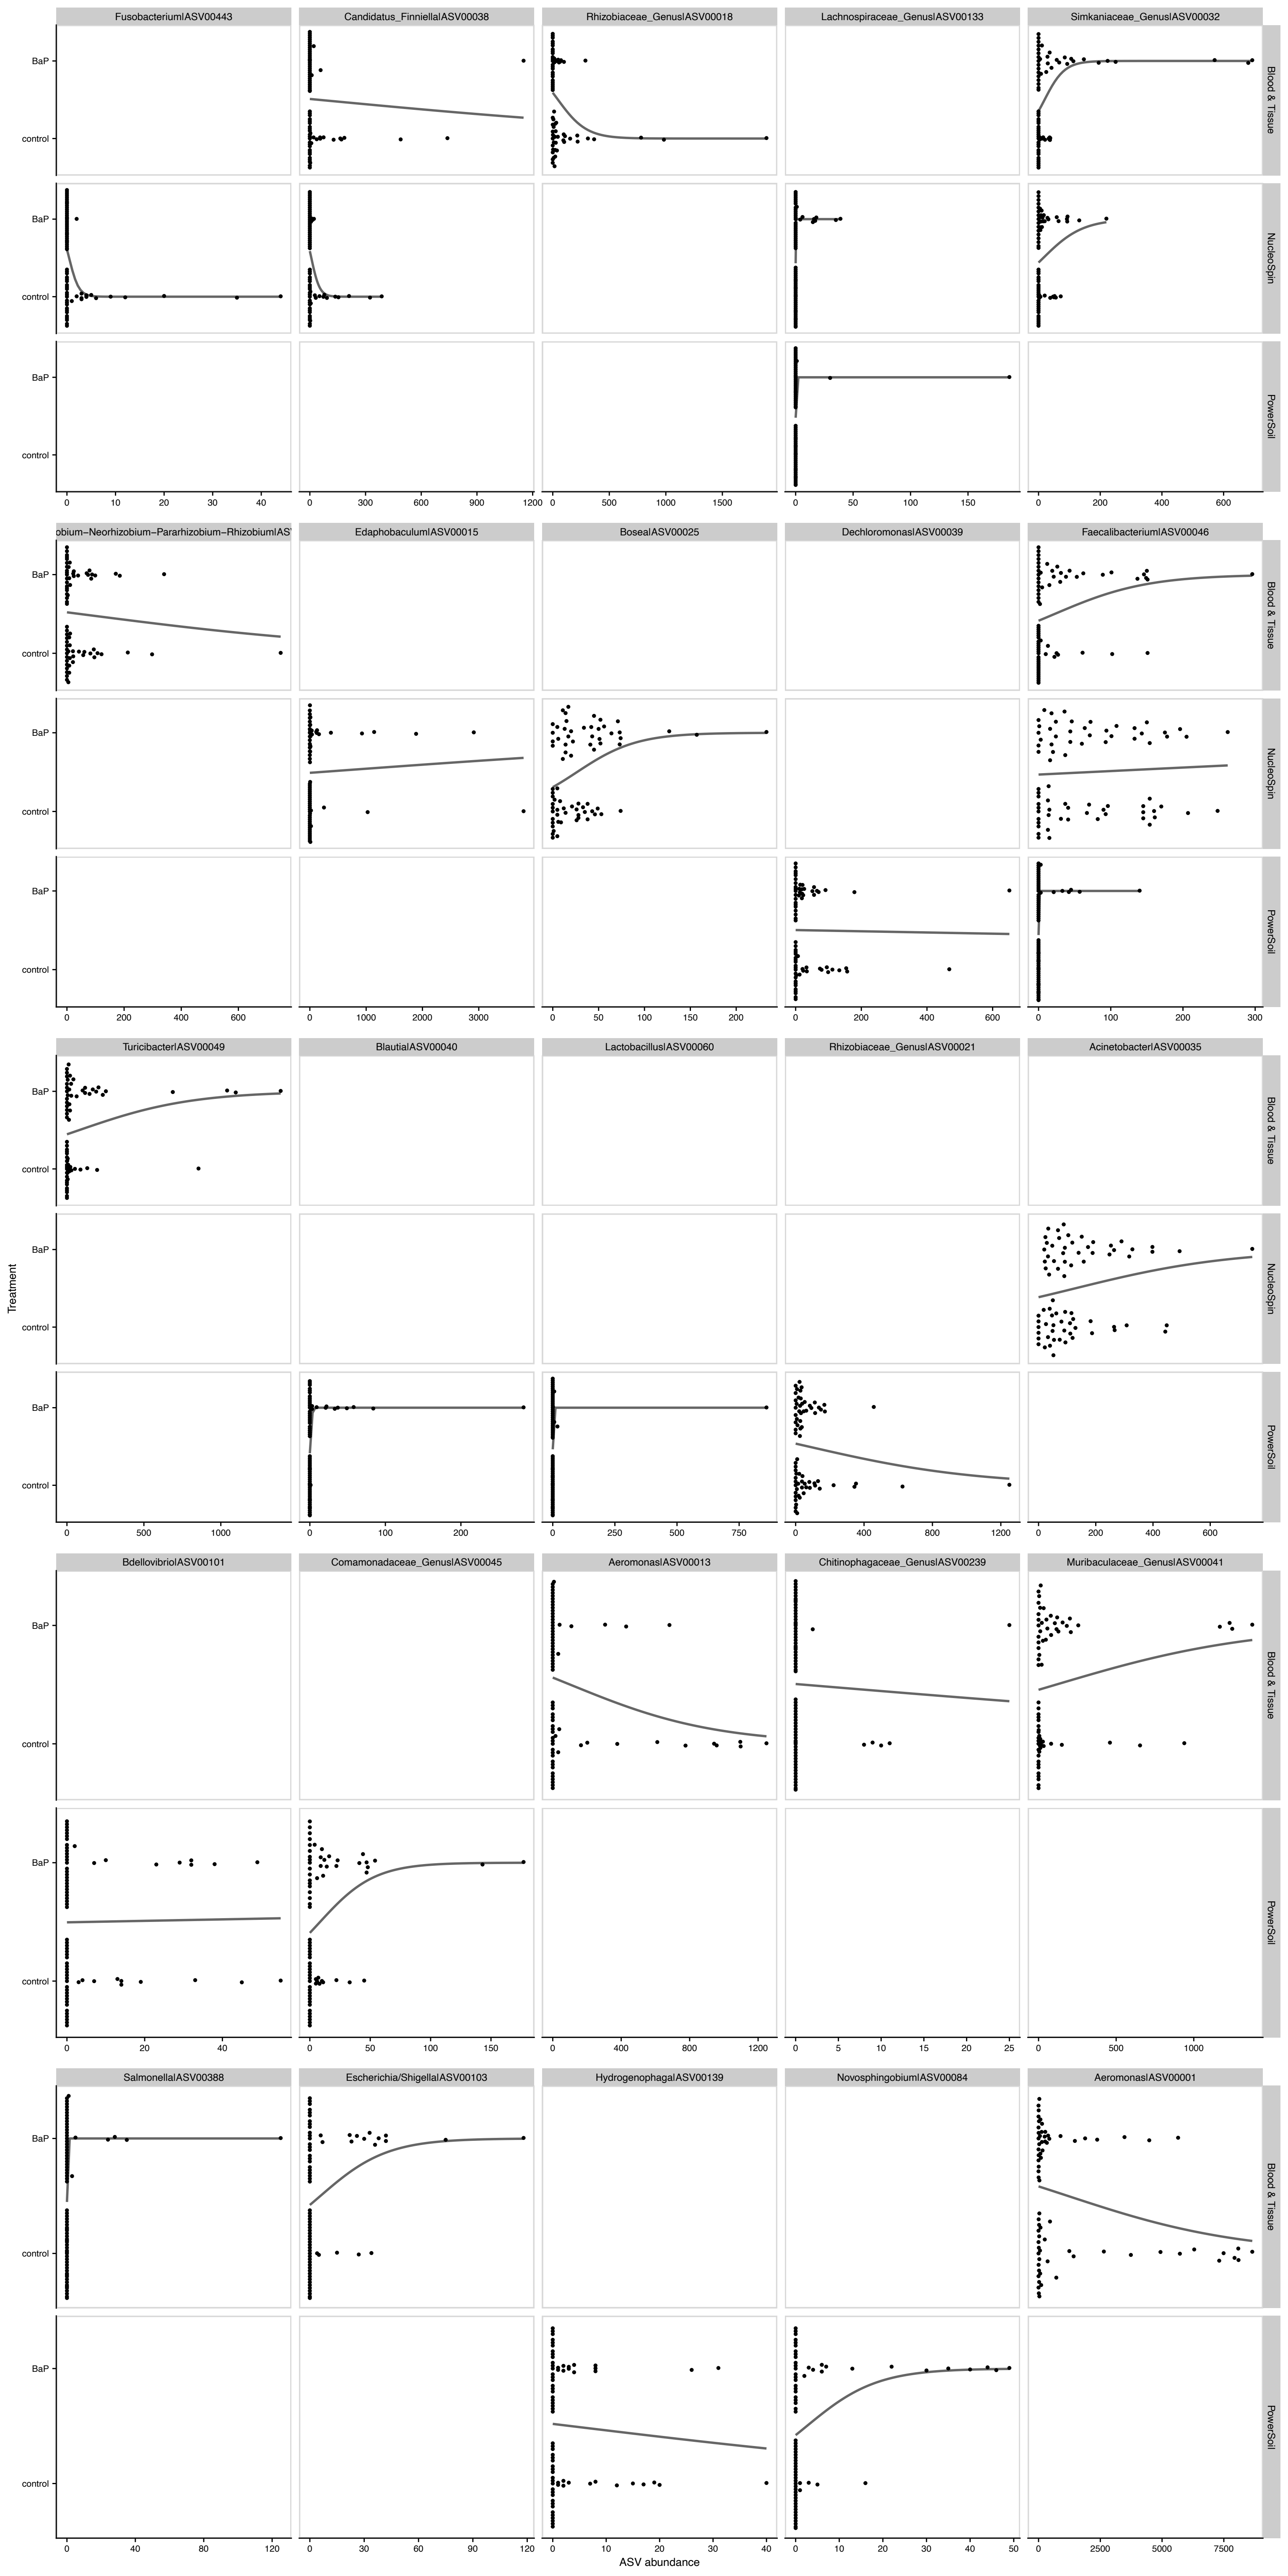

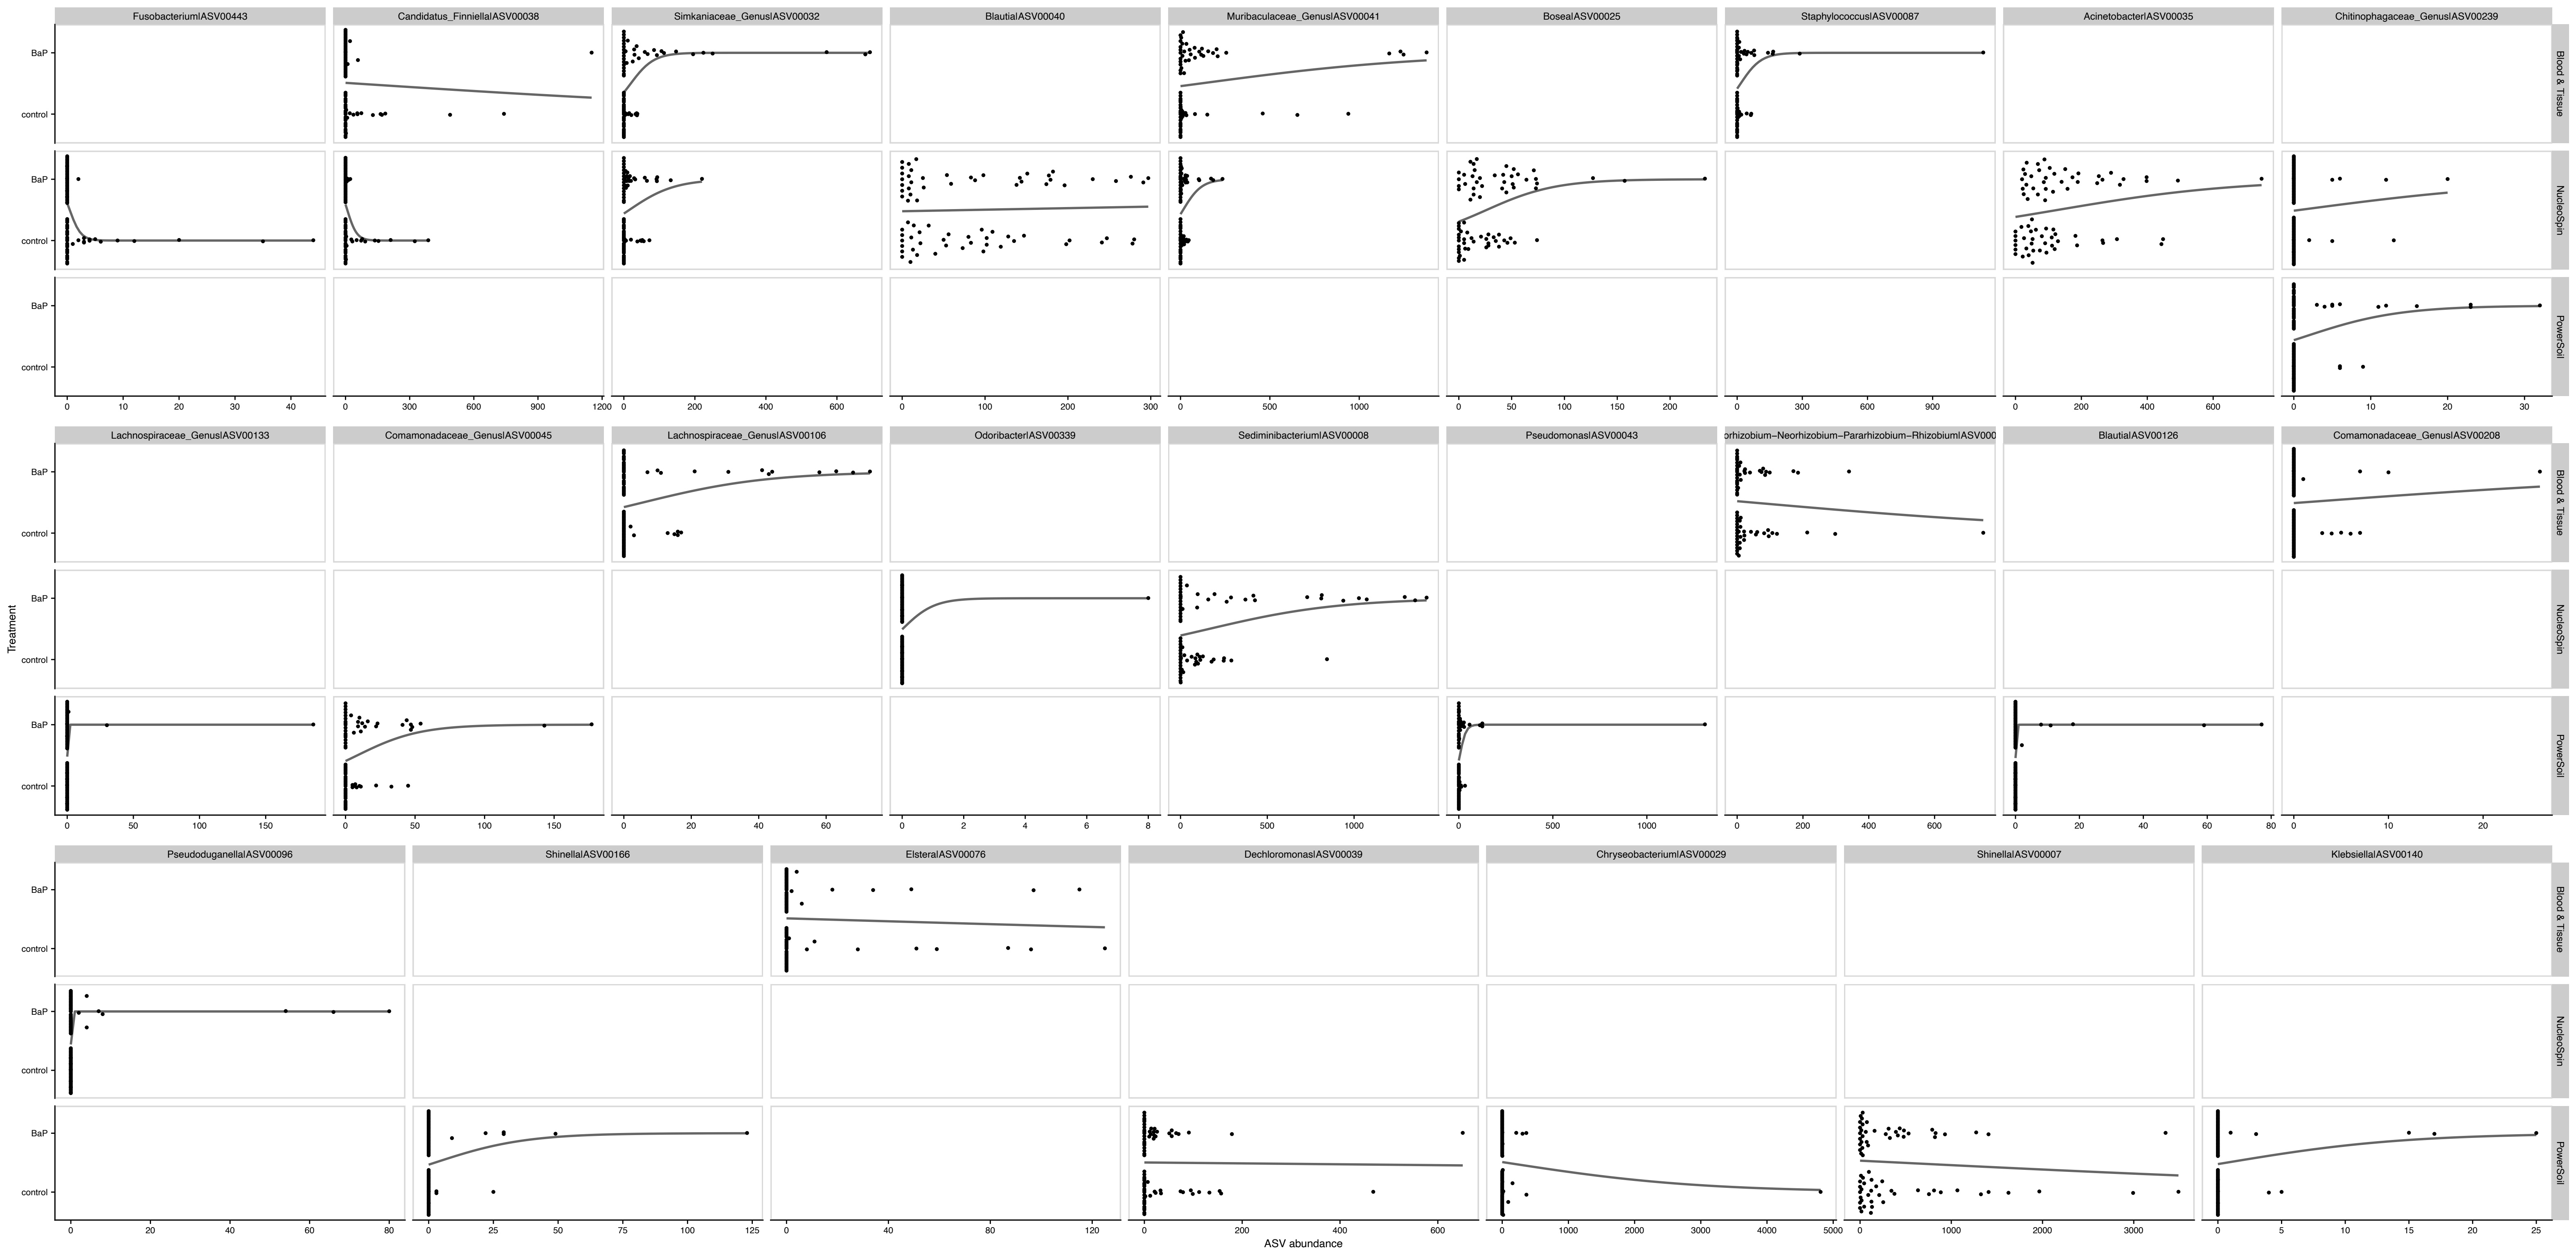



Supplemental Figure 1. Box plots of alpha-diversity metric scores by BaP exposure and PCR method (triplicate vs single reactions).

Supplemental Figure 2. Heatmap of statistically significant effect sizes estimated by LEfSe. This plot shows all phylotypes that were identified as indicators across any data set. The color of the square indicates the effect size with green meaning a phylotype is indicative of the control (no BaP exposure) while orange means a phylotype is indicative of BaP exposure.

Supplemental Figure 3. Receiver operating characteristic (ROC) curve plots for random forest models predicting BaP exposure from various data subsets, indicated by line color or line type, of rarefied ASV counts. (a) ROC curves for dissected gut versus whole fish, with the areas under the curve (AUCs) listed in the table below. (b) Similar data as in panel a, but for subsets by DNA extraction kit.

Supplemental Figure 4. Swarm plots of logistic regressions predicting BaP exposure from individual ASV abundances (rarefied) using data subsets partitioned by dissection method. ASVs are ordered by importance from the preceding random forest analysis. Points indicate an ASV's abundance per each dissection method. Black lines indicate the predicted relationship taken directly from the logistic regression models.

Supplemental Figure 5. Swarm plots of logistic regressions predicting BaP exposure from individual ASV abundances (CLR-transformed) using data subsets partitioned by dissection method. ASVs are ordered by importance from the preceding random forest analysis. (This first 8 ASVs in this figure comprised Figure 6). Points indicate an ASV's abundance per each dissection method. Black lines indicate the predicted relationship taken directly from the logistic regression models.

Supplemental Figure 6. Swarm plots of logistic regressions predicting BaP exposure from individual ASV abundances (rarefied) using data subsets partitioned by DNA extraction kit. ASVs are ordered by importance from the preceding random forest analysis. Points indicate an ASV's abundance per each dissection method. Black lines indicate the predicted relationship taken directly from the logistic regression models.

Supplemental Figure 7. Swarm plots of logistic regressions predicting BaP exposure from individual ASV abundances (CLR-transformed) using data subsets partitioned by DNA extraction kit. ASVs are ordered by importance from the preceding random forest analysis. (This first 8 ASVs in this figure comprised Figure 7). Points indicate an ASV's abundance per each dissection method. Black lines indicate the predicted relationship taken directly from the logistic regression models.

Supplemental Table 1. Counts of biological samples (so not including x3 and x1 PCR as separate samples) in each treatment set. We started with 384 (4 x 96) zebrafish embryos, and after dada2 processing (which include rejecting reads based on low quality) and rarefaction, we ended with 277 biological replicates. For analyses in which we tested the effects of dissection method and extraction kit together, we used the samples subsetted by extraction kit.

| BaP Treatment | Dissection Method | Extraction Kit | Count after QC | Count after subsampling |
|---------------|-------------------|----------------|----------------|-------------------------|
| -             | -                 | -              | 277            | -                       |
| Unexposed     | -                 | -              | 123            | -                       |
| Exposed       | -                 | -              | 154            | -                       |
| -             | Dissected         | -              | 127            | 112                     |
| -             | Whole fish        | -              | 150            | 112                     |
| -             | -                 | PowerSoil      | 92             | 74                      |
| -             | -                 | NucleoSpin     | 96             | 74                      |
| -             | -                 | Blood & Tissue | 89             | 74                      |
| Unexposed     | Dissected         | -              | 56             | 56                      |
| Unexposed     | Whole fish        | -              | 67             | 56                      |
| Exposed       | Dissected         | -              | 71             | 56                      |
| Exposed       | Whole fish        | -              | 83             | 56                      |
| Unexposed     | -                 | PowerSoil      | 43             | 37                      |
| Unexposed     | -                 | NucleoSpin     | 43             | 37                      |
| Unexposed     | -                 | Blood & Tissue | 37             | 37                      |
| Exposed       | -                 | PowerSoil      | 49             | 37                      |
| Exposed       | -                 | NucleoSpin     | 53             | 37                      |
| Exposed       | -                 | Blood & Tissue | 52             | 37                      |
| Unexposed     | Dissected         | PowerSoil      | 18             | 16                      |
| Unexposed     | Dissected         | NucleoSpin     | 22             | 20                      |
| Unexposed     | Dissected         | Blood & Tissue | 16             | 16                      |
| Unexposed     | Whole fish        | PowerSoil      | 25             | 21                      |
| Unexposed     | Whole fish        | NucleoSpin     | 21             | 17                      |
| Unexposed     | Whole fish        | Blood & Tissue | 21             | 21                      |
| Exposed       | Dissected         | PowerSoil      | 21             | 16                      |
| Exposed       | Dissected         | NucleoSpin     | 26             | 18                      |
| Exposed       | Dissected         | Blood & Tissue | 24             | 18                      |
| Exposed       | Whole fish        | PowerSoil      | 28             | 21                      |
| Exposed       | Whole fish        | NucleoSpin     | 27             | 19                      |
| Exposed       | Whole fish        | Blood & Tissue | 28             | 19                      |

Supplemental Table 2. Alpha-diversity by PCR method MM-GLM results (n = 277)

| metric       | term                     | statistic | df | p.value | sig |
|--------------|--------------------------|-----------|----|---------|-----|
| Chao1        | BaP Treatment            | 0.59      | 1  | 0.444   |     |
|              | PCR Method               | 0.08      | 1  | 0.783   |     |
|              | BaP Treatment:PCR Method | 0.13      | 1  | 0.717   |     |
| Shannon      | BaP Treatment            | 2.45      | 1  | 0.117   |     |
|              | PCR Method               | 0.07      | 1  | 0.796   |     |
|              | BaP Treatment:PCR Method | 0.01      | 1  | 0.909   |     |
| Simpson      | BaP Treatment            | 1.98      | 1  | 0.159   |     |
|              | PCR Method               | 0.01      | 1  | 0.907   |     |
|              | BaP Treatment:PCR Method | 0         | 1  | 0.973   |     |
| Phylogenetic | BaP Treatment            | 1.36      | 1  | 0.244   |     |
|              | PCR Method               | 0.14      | 1  | 0.704   |     |
|              | BaP Treatment:PCR Method | 0.03      | 1  | 0.869   |     |
| Observed     | BaP Treatment            | 0.87      | 1  | 0.35    |     |
|              | PCR Method               | 0.13      | 1  | 0.716   |     |
|              | BaP Treatment:PCR Method | 0.25      | 1  | 0.616   |     |

Supplemental Table 3. Alpha-diversity by extraction kit and dissection method GLM results (n = 222)

| metric       | term                            | statistic | df | p.value | sig |
|--------------|---------------------------------|-----------|----|---------|-----|
| Chao1        | BaP Treatment                   | 4.73      | 1  | 0.03    | *   |
|              | Extraction Kit                  | 173.76    | 2  | 0       | *   |
|              | Dissection Method               | 22.06     | 1  | 0       | *   |
|              | BaP Treatment:Extraction Kit    | 6.94      | 2  | 0.031   | *   |
|              | BaP Treatment:Dissection Method | 0.16      | 1  | 0.692   |     |
| Shannon      | BaP Treatment                   | 15.5      | 1  | 0       | *   |
|              | Extraction Kit                  | 78.42     | 2  | 0       | *   |
|              | Dissection Method               | 16.09     | 1  | 0       | *   |
|              | BaP Treatment:Extraction Kit    | 4.5       | 2  | 0.105   |     |
|              | BaP Treatment:Dissection Method | 2.3       | 1  | 0.129   |     |
| Simpson      | BaP Treatment                   | 11.28     | 1  | 0.001   | *   |
|              | Extraction Kit                  | 38.17     | 2  | 0       | *   |
|              | Dissection Method               | 1.22      | 1  | 0.27    |     |
|              | BaP Treatment:Extraction Kit    | 2.5       | 2  | 0.286   |     |
|              | BaP Treatment:Dissection Method | 2.06      | 1  | 0.151   |     |
| Phylogenetic | BaP Treatment                   | 12.45     | 1  | 0       | *   |
|              | Extraction Kit                  | 233.9     | 2  | 0       | *   |
|              | Dissection Method               | 13.36     | 1  | 0       | *   |
|              | BaP Treatment:Extraction Kit    | 4.13      | 2  | 0.127   |     |
|              | BaP Treatment:Dissection Method | 0.03      | 1  | 0.867   |     |
| Observed     | BaP Treatment                   | 5.82      | 1  | 0.016   | *   |
|              | Extraction Kit                  | 177.55    | 2  | 0       | *   |
|              | Dissection Method               | 26.18     | 1  | 0       | *   |
|              | BaP Treatment:Extraction Kit    | 6.36      | 2  | 0.042   | *   |
|              | BaP Treatment:Dissection Method | 0.12      | 1  | 0.726   |     |

Supplemental Table 4. PCR methods PERMANOVA results (n = 277)

| metric      | term                     | df  | SumOfSqs/Variance | statistic | p.value | sig |
|-------------|--------------------------|-----|-------------------|-----------|---------|-----|
| Bray-Curtis | BaP Treatment            | 1   | 2.81              | 7.35      | 0.002   | *   |
|             | PCR Method               | 1   | 0.08              | 0.21      | 0.002   | *   |
|             | BaP Treatment:PCR Method | 1   | 0.04              | 0.11      | 0.581   |     |
|             | Residual                 | 623 | 238.27            |           |         |     |
| Canberra    | BaP Treatment            | 1   | 1.4               | 3.18      | 0.001   | *   |
|             | PCR Method               | 1   | 0.4               | 0.9       | 0.001   | *   |
|             | BaP Treatment:PCR Method | 1   | 0.24              | 0.55      | 0.304   |     |
|             | Residual                 | 623 | 275.08            |           |         |     |
| Sørensen    | BaP Treatment            | 1   | 1.98              | 6.09      | 0.001   | *   |
|             | PCR Method               | 1   | 0.34              | 1.05      | 0.001   | *   |
|             | BaP Treatment:PCR Method | 1   | 0.16              | 0.48      | 0.054   |     |
|             | Residual                 | 623 | 202.77            |           |         |     |
| Aitchison   | BaP Treatment            | 1   | 15.2              | 4.58      | 0.001   | *   |
|             | PCR Method               | 1   | 2.78              | 0.84      | 0.001   | *   |
|             | BaP Treatment:PCR Method | 1   | 1.51              | 0.46      | 0.089   |     |
|             | Residual                 | 622 | 2,065.26          |           |         |     |
| W Unifrac   | BaP Treatment            | 1   | 0.39              | 20.03     | 0.001   | *   |
|             | PCR Method               | 1   | 0                 | 0.19      | 0.001   | *   |
|             | BaP Treatment:PCR Method | 1   | 0                 | 0.07      | 0.326   |     |
|             | Residual                 | 623 | 12                |           |         |     |
| 0.5 Unifrac | BaP Treatment            | 1   | 1.41              | 13.52     | 0.001   | *   |
|             | PCR Method               | 1   | 0.04              | 0.39      | 0.001   | *   |
|             | BaP Treatment:PCR Method | 1   | 0.02              | 0.18      | 0.071   |     |
|             | Residual                 | 623 | 64.87             |           |         |     |
| U Unifrac   | BaP Treatment            | 1   | 2.11              | 6.13      | 0.001   | *   |
|             | PCR Method               | 1   | 0.34              | 0.98      | 0.001   | *   |
|             | BaP Treatment:PCR Method | 1   | 0.16              | 0.47      | 0.083   |     |
|             | Residual                 | 623 | 214.18            |           |         |     |



Supplemental Table 5. Extraction kit and dissection methods PERMANOVA results (n = 222)

| metric      | term                            | df  | SumOfSqs/Variance | statistic | p.value | sig |
|-------------|---------------------------------|-----|-------------------|-----------|---------|-----|
| Bray-Curtis | BaP Treatment                   | 1   | 0.83              | 2.54      | 0.005   | *   |
|             | Extraction Kit                  | 2   | 6.13              | 9.4       | 0.001   | *   |
|             | Dissection Method               | 1   | 6.65              | 20.38     | 0.001   | *   |
|             | BaP Treatment:Extraction Kit    | 2   | 0.76              | 1.16      | 0.239   |     |
|             | BaP Treatment:Dissection Method | 1   | 0.38              | 1.15      | 0.277   |     |
|             | Residual                        | 214 | 69.81             |           |         |     |
| Canberra    | BaP Treatment                   | 1   | 0.65              | 1.54      | 0.001   | *   |
|             | Extraction Kit                  | 2   | 4.13              | 4.94      | 0.001   | *   |
|             | Dissection Method               | 1   | 2.68              | 6.4       | 0.001   | *   |
|             | BaP Treatment:Extraction Kit    | 2   | 0.91              | 1.09      | 0.098   |     |
|             | BaP Treatment:Dissection Method | 1   | 0.49              | 1.18      | 0.053   |     |
|             | Residual                        | 214 | 89.58             |           |         |     |
| Sørensen    | BaP Treatment                   | 1   | 0.81              | 3.12      | 0.001   | *   |
|             | Extraction Kit                  | 2   | 8.48              | 16.28     | 0.001   | *   |
|             | Dissection Method               | 1   | 4.09              | 15.7      | 0.001   | *   |
|             | BaP Treatment:Extraction Kit    | 2   | 0.67              | 1.28      | 0.085   |     |
|             | BaP Treatment:Dissection Method | 1   | 0.34              | 1.3       | 0.113   |     |
|             | Residual                        | 214 | 55.74             |           |         |     |
| Aitchison   | BaP Treatment                   | 1   | 17.79             | 2.17      | 0.003   | *   |
|             | Extraction Kit                  | 2   | 212.71            | 12.95     | 0.001   | *   |
|             | Dissection Method               | 1   | 129.6             | 15.78     | 0.001   | *   |
|             | BaP Treatment:Extraction Kit    | 2   | 20.43             | 1.24      | 0.099   |     |
|             | BaP Treatment:Dissection Method | 1   | 11.22             | 1.37      | 0.078   |     |
|             | Residual                        | 213 | 1,749.26          |           |         |     |
| W Unifrac   | BaP Treatment                   | 1   | 0.12              | 7.39      | 0.001   | *   |
|             | Extraction Kit                  | 2   | 0.36              | 11.05     | 0.001   | *   |
|             | Dissection Method               | 1   | 0.42              | 25.82     | 0.001   | *   |
|             | BaP Treatment:Extraction Kit    | 2   | 0.04              | 1.37      | 0.151   |     |
|             | BaP Treatment:Dissection Method | 1   | 0.02              | 0.95      | 0.409   |     |
|             | Residual                        | 214 | 3.5               |           |         |     |
| 0.5 Unifrac | BaP Treatment                   | 1   | 0.46              | 5.63      | 0.001   | *   |
|             | Extraction Kit                  | 2   | 2.96              | 18.23     | 0.001   | *   |
|             | Dissection Method               | 1   | 2.23              | 27.45     | 0.001   | *   |
|             | BaP Treatment:Extraction Kit    | 2   | 0.22              | 1.38      | 0.101   |     |
|             | BaP Treatment:Dissection Method | 1   | 0.13              | 1.57      | 0.09    |     |
|             | Residual                        | 214 | 17.37             |           |         |     |
| U Unifrac   | BaP Treatment                   | 1   | 0.84              | 2.77      | 0.001   | *   |
|             | Extraction Kit                  | 2   | 6.73              | 11.13     | 0.001   | *   |
|             | Dissection Method               | 1   | 3.43              | 11.34     | 0.001   | *   |
|             | BaP Treatment:Extraction Kit    | 2   | 0.71              | 1.17      | 0.113   |     |
|             | BaP Treatment:Dissection Method | 1   | 0.43              | 1.43      | 0.038   | *   |
|             | Residual                        | 214 | 64.68             |           |         |     |

Supplemental Table 6. Results of two binomial GLM models (one for each dissection method), built in a serial, forward stepwise manner predicting BaP treatment from individual ASV abundances.

| data.set   | term     | statistic | df    | p.value | sig |
|------------|----------|-----------|-------|---------|-----|
| dissected  | ASV00002 | 1,335.57  | 1     | 0       | *   |
|            | ASV00007 | 1,912.27  | 1     | 0       | *   |
|            | ASV00017 | 18.23     | 1     | 0       | *   |
|            | ASV00019 | 42.08     | 1     | 0       | *   |
|            | ASV00049 | 13.03     | 1     | 0       | *   |
|            | ASV00067 | 2.2       | 1     | 0.138   |     |
|            | ASV00075 | 11.98     | 1     | 0.001   | *   |
|            | ASV00078 | 21.8      | 1     | 0       | *   |
|            | ASV00087 | 1,263.48  | 1     | 0       | *   |
|            | ASV00095 | 4.31      | 1     | 0.038   | *   |
|            | ASV00098 | 22.48     | 1     | 0       | *   |
|            | ASV00103 | 27.09     | 1     | 0       | *   |
|            | ASV00109 | 5.52      | 1     | 0.019   | *   |
|            | ASV00131 | 1,191.39  | 1     | 0       | *   |
|            | ASV00138 | 7.45      | 1     | 0.006   | *   |
|            | ASV00140 | 10.56     | 1     | 0.001   | *   |
|            | ASV00219 | 11.08     | 1     | 0.001   | *   |
|            | ASV00225 | 7.96      | 1     | 0.005   | *   |
| ASV00266   | 12.65    | 1         | 0     | *       |     |
| ASV00298   | 8.21     | 1         | 0.004 | *       |     |
| whole fish | ASV00004 | 32.04     | 1     | 0       | *   |
|            | ASV00014 | 25.03     | 1     | 0       | *   |
|            | ASV00024 | 34.19     | 1     | 0       | *   |
|            | ASV00029 | 20.91     | 1     | 0       | *   |
|            | ASV00032 | 57.77     | 1     | 0       | *   |
|            | ASV00038 | 32.7      | 1     | 0       | *   |
|            | ASV00046 | 37.83     | 1     | 0       | *   |
|            | ASV00092 | 14.92     | 1     | 0       | *   |
|            | ASV00093 | 11.56     | 1     | 0.001   | *   |
|            | ASV00099 | 24.96     | 1     | 0       | *   |
|            | ASV00110 | 30.36     | 1     | 0       | *   |
|            | ASV00117 | 34.72     | 1     | 0       | *   |
|            | ASV00182 | 31.43     | 1     | 0       | *   |
|            | ASV00239 | 22.82     | 1     | 0       | *   |
|            | ASV00240 | 20.57     | 1     | 0       | *   |
|            | ASV00324 | 15.75     | 1     | 0       | *   |

Supplemental Table 7. Results of two binomial GLM models (one for each dissection method), built in a serial, forward stepwise manner predicting BaP treatment from individual ASV abundances.

| data.set   | term     | statistic | df | p.value | sig |
|------------|----------|-----------|----|---------|-----|
| dissected  | ASV00011 | 39.2      | 1  | 0       | *   |
|            | ASV00017 | 33.78     | 1  | 0       | *   |
|            | ASV00018 | 42.81     | 1  | 0       | *   |
|            | ASV00028 | 58.23     | 1  | 0       | *   |
|            | ASV00032 | 70.57     | 1  | 0       | *   |
|            | ASV00033 | 72.52     | 1  | 0       | *   |
|            | ASV00041 | 34.75     | 1  | 0       | *   |
|            | ASV00045 | 38.52     | 1  | 0       | *   |
|            | ASV00049 | 28.05     | 1  | 0       | *   |
|            | ASV00061 | 43.83     | 1  | 0       | *   |
|            | ASV00071 | 22.74     | 1  | 0       | *   |
|            | ASV00073 | 50.89     | 1  | 0       | *   |
|            | ASV00075 | 47.71     | 1  | 0       | *   |
|            | ASV00087 | 34.96     | 1  | 0       | *   |
|            | ASV00095 | 23.97     | 1  | 0       | *   |
|            | ASV00106 | 29.8      | 1  | 0       | *   |
|            | ASV00182 | 73.23     | 1  | 0       | *   |
|            | ASV00220 | 1,946.36  | 1  | 0       | *   |
| ASV00222   | 36.8     | 1         | 0  | *       |     |
| ASV00244   | 27.22    | 1         | 0  | *       |     |
| whole fish | ASV00003 | 0.75      | 1  | 0.386   |     |
|            | ASV00004 | 16.9      | 1  | 0       | *   |
|            | ASV00032 | 34.04     | 1  | 0       | *   |
|            | ASV00038 | 31.38     | 1  | 0       | *   |
|            | ASV00046 | 7.26      | 1  | 0.007   | *   |
|            | ASV00091 | 7.03      | 1  | 0.008   | *   |
|            | ASV00117 | 21.6      | 1  | 0       | *   |
|            | ASV00167 | 4.16      | 1  | 0.041   | *   |
|            | ASV00239 | 13.28     | 1  | 0       | *   |
|            | ASV00310 | 4.84      | 1  | 0.028   | *   |
|            | ASV00324 | 3.48      | 1  | 0.062   |     |

Supplemental Table 8. Results of three binomial GLM models (one for each extraction kit), built in a serial, forward stepwise manner predicting BaP treatment from individual ASV abundances.

| data.set       | term     | statistic | df    | p.value | sig |
|----------------|----------|-----------|-------|---------|-----|
| Blood & Tissue | ASV00011 | 0         | 1     | 0.999   |     |
|                | ASV00022 | 10.89     | 1     | 0.001   | *   |
|                | ASV00024 | 0         | 1     | 1       |     |
|                | ASV00032 | 19.06     | 1     | 0       | *   |
|                | ASV00038 | 25.86     | 1     | 0       | *   |
|                | ASV00041 | 21.02     | 1     | 0       | *   |
|                | ASV00046 | 0         | 1     | 0.999   |     |
|                | ASV00076 | 792.96    | 1     | 0       | *   |
|                | ASV00087 | 27.98     | 1     | 0       | *   |
|                | ASV00106 | 8.69      | 1     | 0.003   | *   |
|                | ASV00145 | 0         | 1     | 1       |     |
|                | ASV00208 | 21.03     | 1     | 0       | *   |
| NucleoSpin     | ASV00008 | 21.29     | 1     | 0       | *   |
|                | ASV00025 | 14.98     | 1     | 0       | *   |
|                | ASV00032 | 17.94     | 1     | 0       | *   |
|                | ASV00035 | 21.86     | 1     | 0       | *   |
|                | ASV00038 | 39.93     | 1     | 0       | *   |
|                | ASV00040 | 30.59     | 1     | 0       | *   |
|                | ASV00041 | 432.52    | 1     | 0       | *   |
|                | ASV00096 | 14.78     | 1     | 0       | *   |
|                | ASV00239 | 18.77     | 1     | 0       | *   |
|                | ASV00339 | 9.98      | 1     | 0.002   | *   |
|                | ASV00443 | 28.48     | 1     | 0       | *   |
| PowerSoil      | ASV00005 | 3.79      | 1     | 0.052   |     |
|                | ASV00007 | 15.62     | 1     | 0       | *   |
|                | ASV00029 | 5.13      | 1     | 0.023   | *   |
|                | ASV00039 | 5.62      | 1     | 0.018   | *   |
|                | ASV00043 | 17.61     | 1     | 0       | *   |
|                | ASV00045 | 18.34     | 1     | 0       | *   |
|                | ASV00062 | 1.57      | 1     | 0.211   |     |
|                | ASV00126 | 4.24      | 1     | 0.039   | *   |
|                | ASV00133 | 8.52      | 1     | 0.004   | *   |
|                | ASV00140 | 4.8       | 1     | 0.028   | *   |
|                | ASV00166 | 13.61     | 1     | 0       | *   |
| ASV00239       | 8.77     | 1         | 0.003 | *       |     |

Supplemental Table 9. Results of three binomial GLM models (one for each extraction kit), built in a serial, forward stepwise manner predicting BaP treatment from individual ASV abundances.

| data.set       | term     | statistic | df | p.value | sig |
|----------------|----------|-----------|----|---------|-----|
| Blood & Tissue | ASV00001 | 26.43     | 1  | 0       | *   |
|                | ASV00013 | 25.29     | 1  | 0       | *   |
|                | ASV00018 | 28.59     | 1  | 0       | *   |
|                | ASV00022 | 21.33     | 1  | 0       | *   |
|                | ASV00032 | 59.8      | 1  | 0       | *   |
|                | ASV00038 | 45.04     | 1  | 0       | *   |
|                | ASV00041 | 23.68     | 1  | 0       | *   |
|                | ASV00046 | 30.82     | 1  | 0       | *   |
|                | ASV00049 | 30.16     | 1  | 0       | *   |
|                | ASV00103 | 28.6      | 1  | 0       | *   |
|                | ASV00239 | 29.57     | 1  | 0       | *   |
|                | ASV00388 | 26.83     | 1  | 0       | *   |
| NucleoSpin     | ASV00015 | 20.18     | 1  | 0       | *   |
|                | ASV00024 | 0         | 1  | 0.999   |     |
|                | ASV00025 | 18.74     | 1  | 0       | *   |
|                | ASV00032 | 12.21     | 1  | 0       | *   |
|                | ASV00035 | 17.68     | 1  | 0       | *   |
|                | ASV00038 | 44.9      | 1  | 0       | *   |
|                | ASV00041 | 0         | 1  | 1       |     |
|                | ASV00046 | 22.33     | 1  | 0       | *   |
|                | ASV00049 | 0         | 1  | 0.984   |     |
|                | ASV00093 | 0         | 1  | 0.999   |     |
|                | ASV00133 | 18.63     | 1  | 0       | *   |
|                | ASV00443 | 29.36     | 1  | 0       | *   |
| PowerSoil      | ASV00021 | 6.24      | 1  | 0.013   | *   |
|                | ASV00038 | 0         | 1  | 1       |     |
|                | ASV00039 | 17.48     | 1  | 0       | *   |
|                | ASV00040 | 4.48      | 1  | 0.034   | *   |
|                | ASV00045 | 19.26     | 1  | 0       | *   |
|                | ASV00046 | 15.95     | 1  | 0       | *   |
|                | ASV00058 | 0.98      | 1  | 0.323   |     |
|                | ASV00060 | 20.36     | 1  | 0       | *   |
|                | ASV00084 | 27.18     | 1  | 0       | *   |
|                | ASV00099 | 1.16      | 1  | 0.282   |     |
|                | ASV00101 | 21.69     | 1  | 0       | *   |
|                | ASV00133 | 15.84     | 1  | 0       | *   |
|                | ASV00139 | 12.74     | 1  | 0       | *   |
